# Supplementary material for: Antidepressant-like effect of ginsenoside Rb1 on potentiating synaptic plasticity via the miR-134–mediated BDNF signaling pathway in a mouse model of chronic stress-induced depression
Source: PubMed Central journal article supplement — J Ginseng Res. 2021 Mar 20;46(3):376–86. doi: 10.1016/j.jgr.2021.03.005 (PMC9120625; doi:10.1016/j.jgr.2021.03.005), 2021-03-20

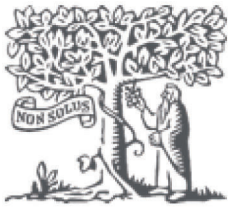

ELSEVIER

# Certificate of Elsevier Language Editing Services

**The following article was edited by Elsevier Language Editing Services:**

**"Antidepressant-like effect of ginsenoside Rb1 on potentiating synaptic plasticity via the miR-134—mediated BDNF signaling pathway in a mice model of chronic stress"**

**Authored by:  
Guoli Wang**

Date: 28-Feb-2021

Serial number: LEEX-12753-882DE89E7CE5

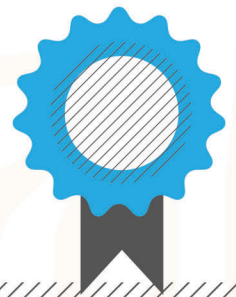

Supplement: mmc3.pdf [file mmc3.pdf]
